# Supplementary material
Source: publisher figshare collection journal article supplement (https://gsapubs.figshare.com/ndownloader/files/23295644)
Supplement: Supplementary file 1 [file 23295644]

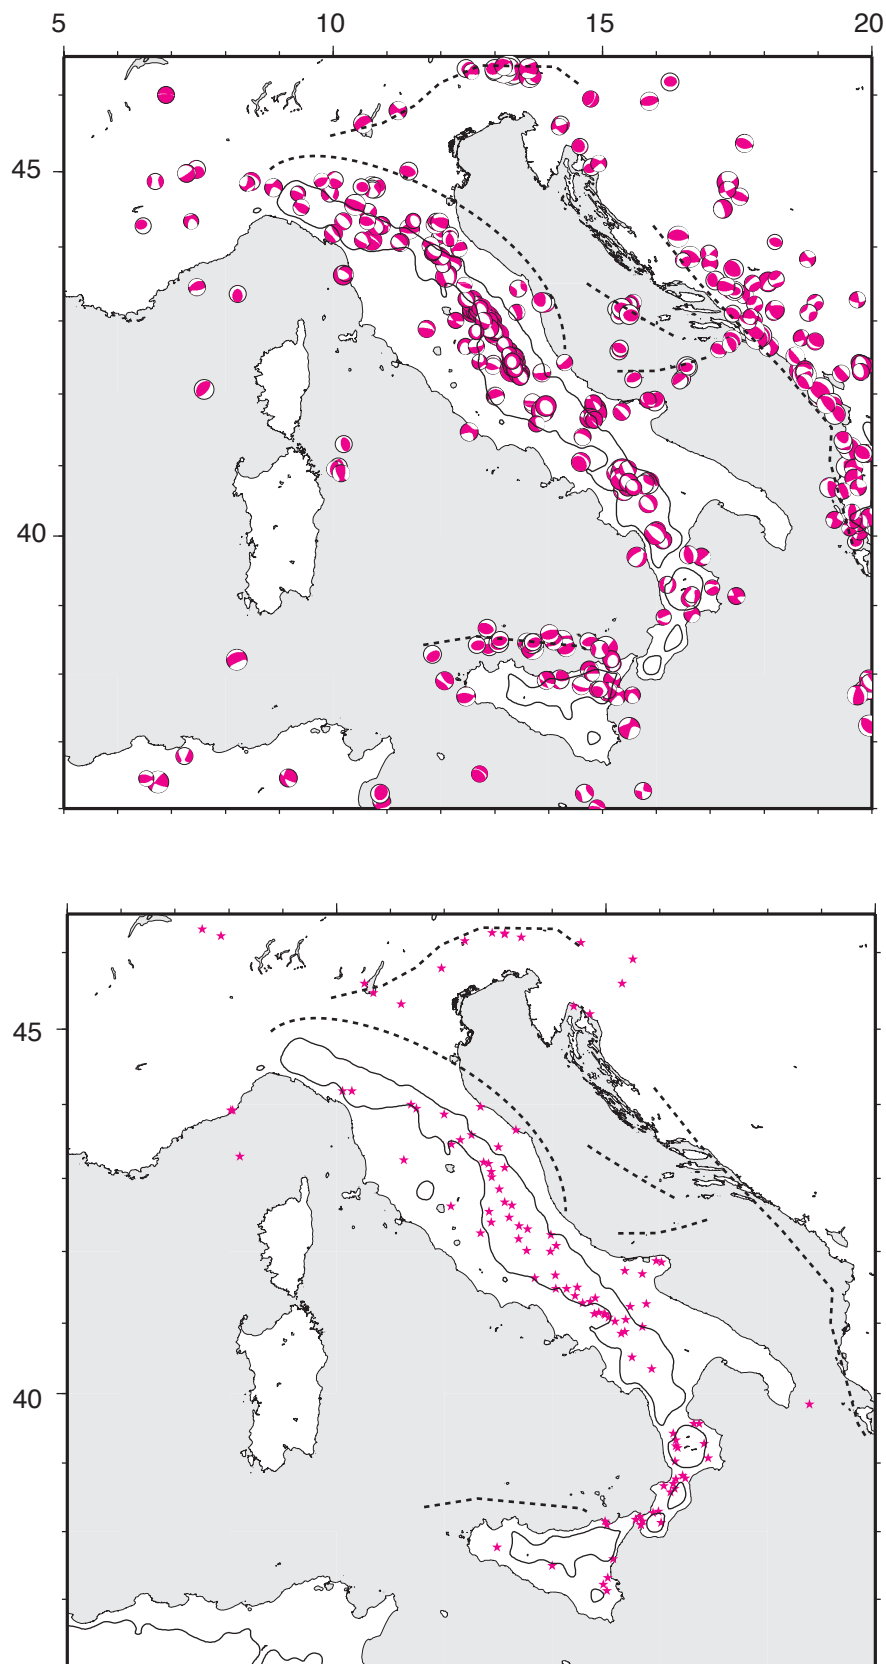

Figure DR1. a) Focal mechanisms of  $M > 4.0$  earthquakes occurred in the period 1977-2011, RCMT catalog (see Pondrelli et al., 2006). The elevated regions of the Apennines is shown along with the area of compression (dashed lines). b) Historical earthquakes with  $M_e > 6.0$ , from the CFTI catalog published by INGV.
